# Supplementary material
Source: publisher figshare collection journal article supplement (https://acs.figshare.com/ndownloader/files/3972985)
Supplement: Supplementary file 1 [file 3972985]

# Supporting Information

## Decomposition of Potent Greenhouse Gas Sulfur Hexafluoride (SF<sub>6</sub>) by Kirschsteinite-dominant Stainless Steel Slag

Jia Zhang <sup>a</sup>, Ji Zhi Zhou <sup>a</sup>, Zhi Ping Xu <sup>b</sup>, Yajun Li <sup>a</sup>, Jun Zhao <sup>a</sup>, Xiuxiu Ruan <sup>a</sup>, Qiang Liu <sup>a\*</sup>,  
Guangren Qian <sup>a\*\*</sup>

Page S2: **Figure S1** Schematic diagram of experimental setup

Page S3: **Figure S2.** Data acquirement, treatment and presentation

Page S4: **Figure S3.** Blank test ran under no slag at 600 °C

Page S5: **Figure S4**  $\alpha$  and  $\alpha^2$  fitted with time

Page S6: **Figure S5** FTIR of slag before and after reaction

Page S7: **Figure S6** CO<sub>2</sub>-TPD of slag before and after reaction

Page S8: **Figure S7** EDSs of SSS before and after reaction: partial comparison

Page S9: **Figure S8** Scheme of sintering **(A)**; reacted SSS powder **(B)**; reacted SSS with 10 %  
Fe<sub>2</sub>O<sub>3</sub> **(C)**

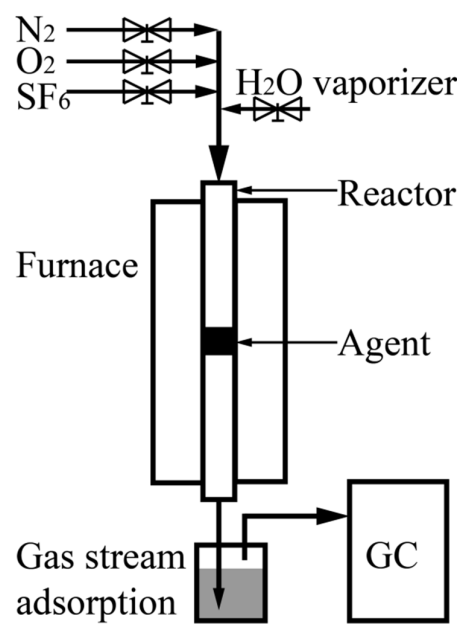

**Figure S1** Schematic diagram of experimental setup

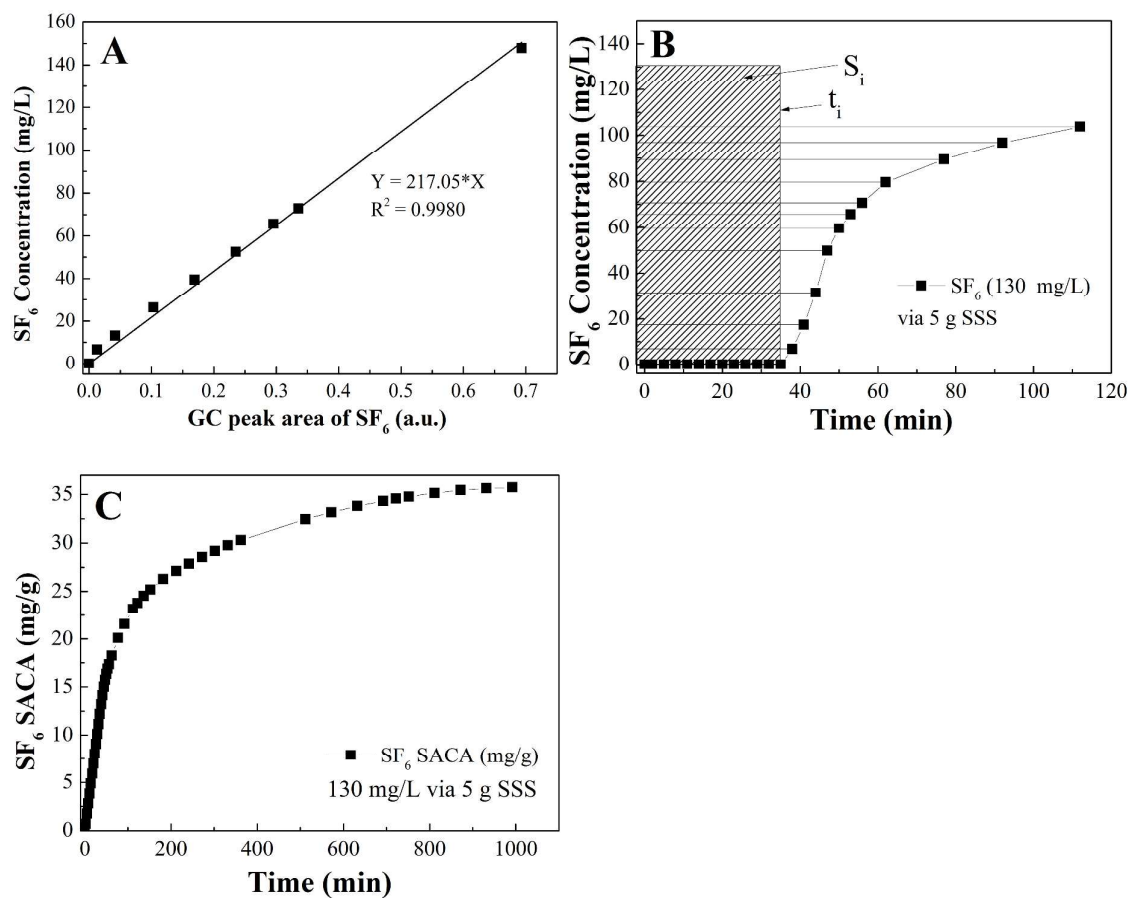

**Figure S2.** Data acquirement, treatment and presentation

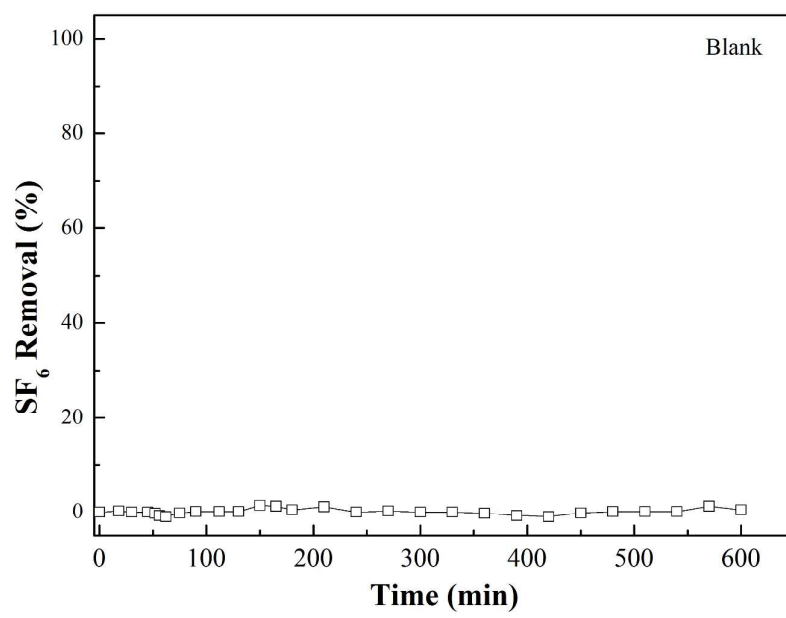

**Figure S3.** Blank test ran under no slag at 600 °C

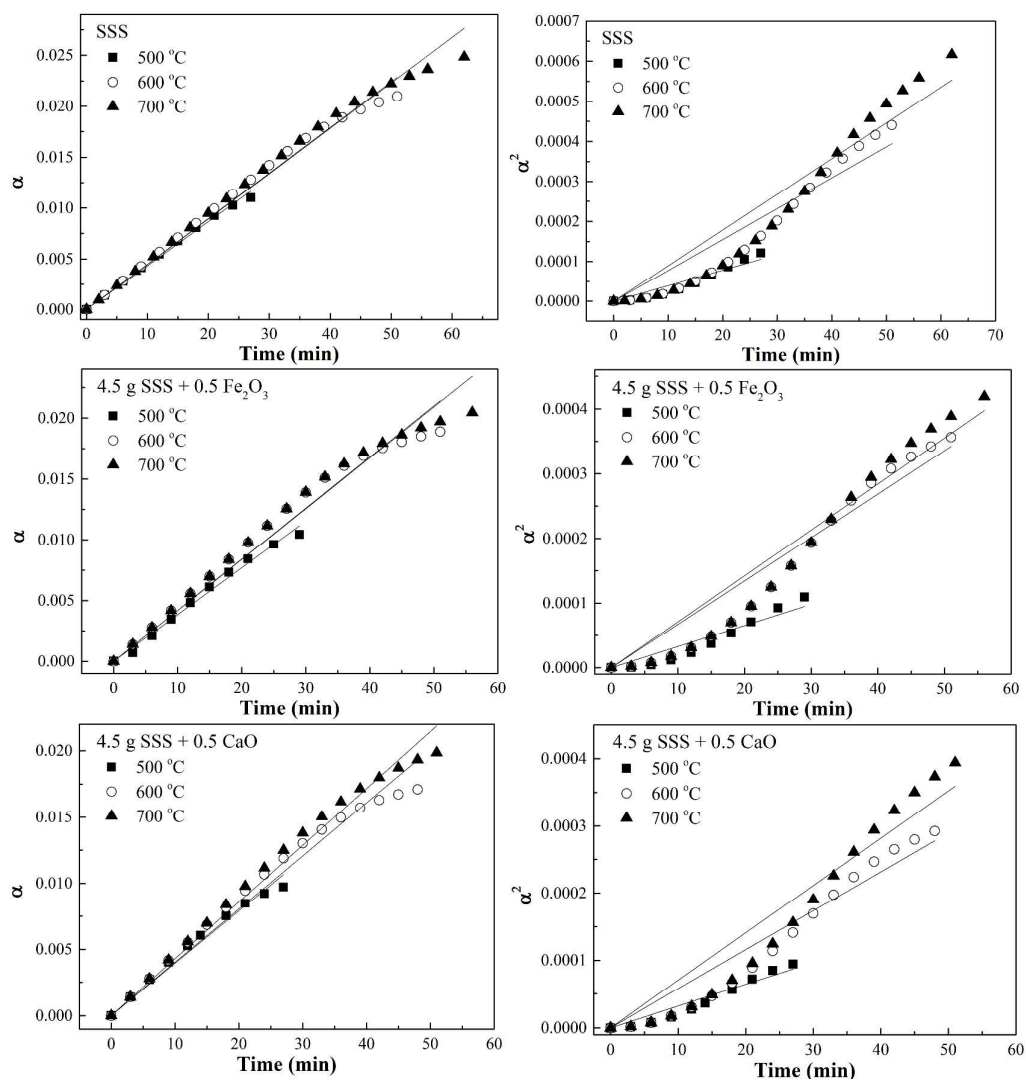

**Figure S4**  $\alpha$  and  $\alpha^2$  fitted with time

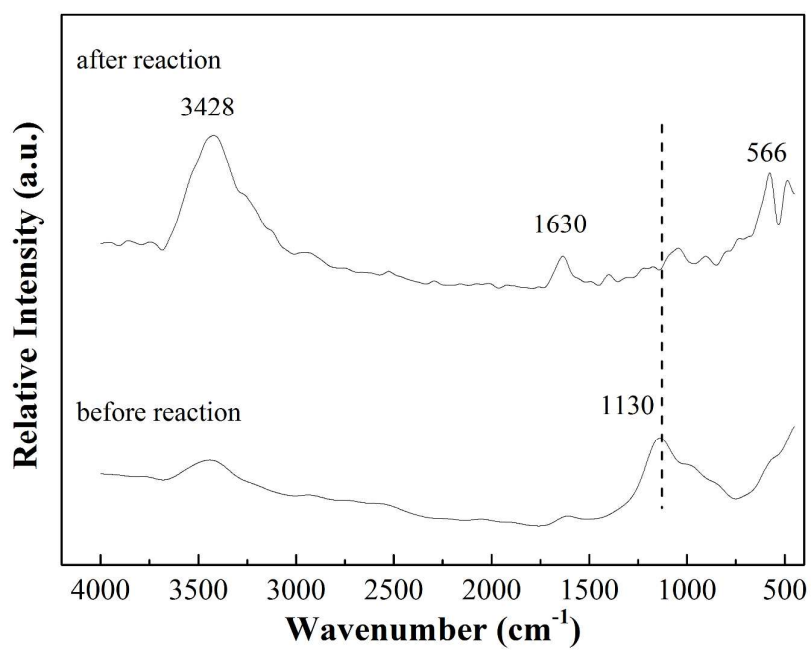

**Figure S5** FTIR of slag before and after reaction

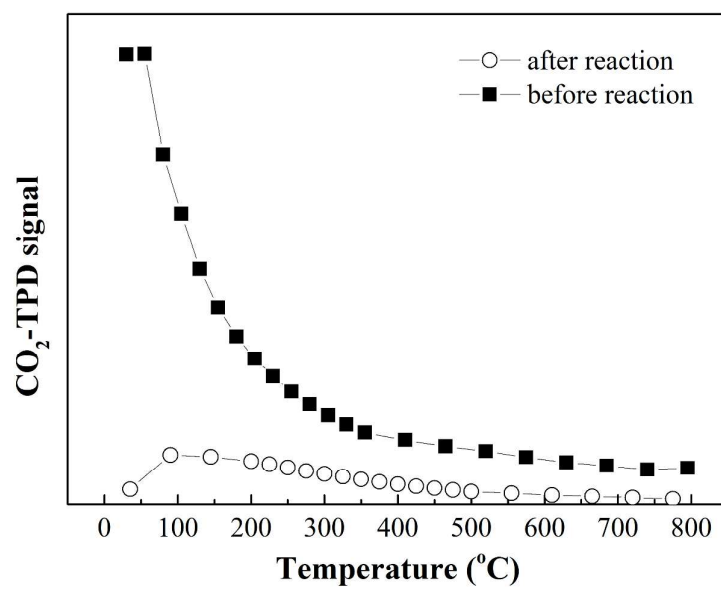

**Figure S6** CO<sub>2</sub>-TPD of slag before and after reaction

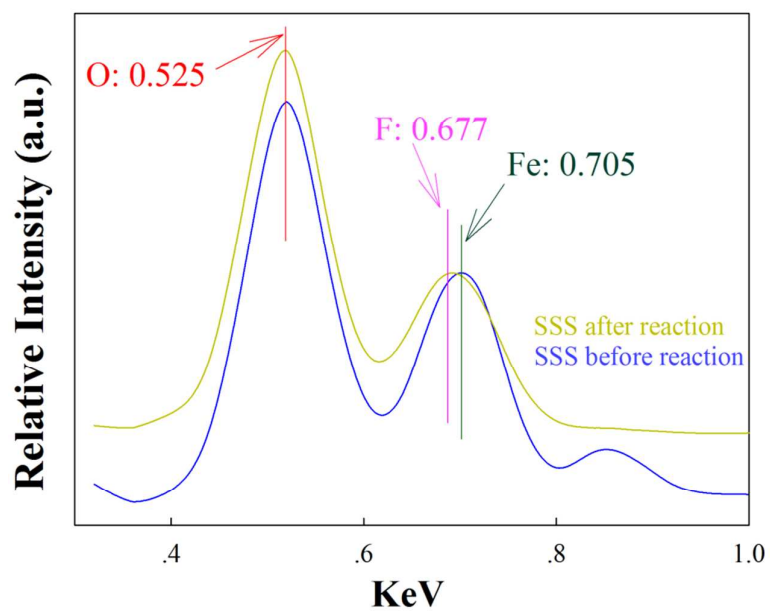

**Figure S7** EDSs of SSS before and after reaction: partial comparison



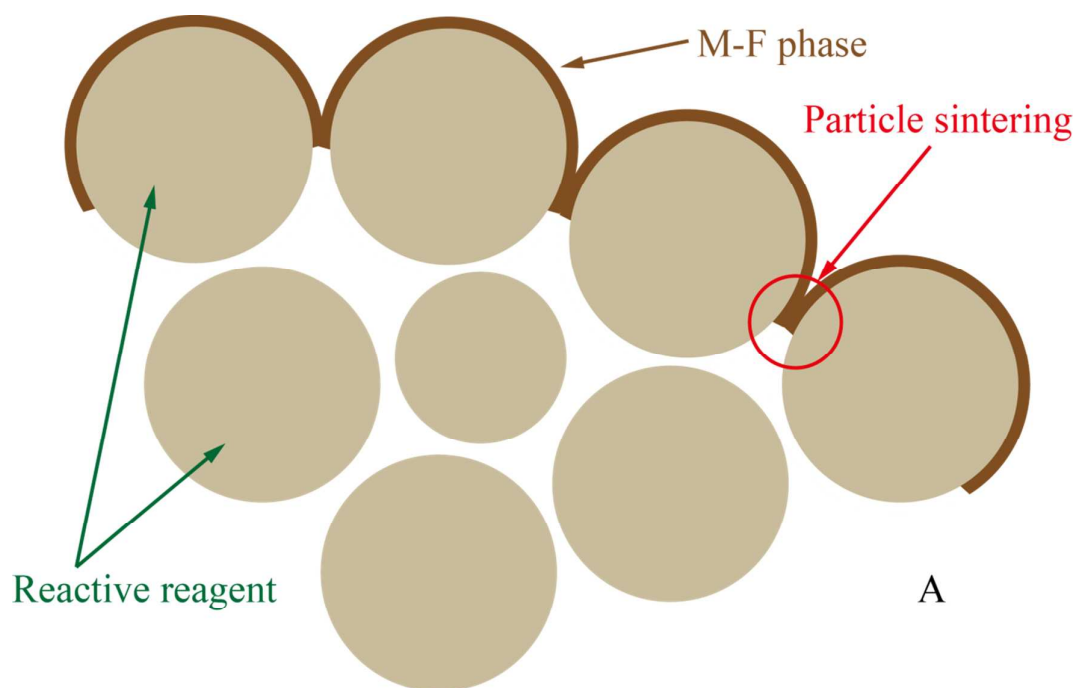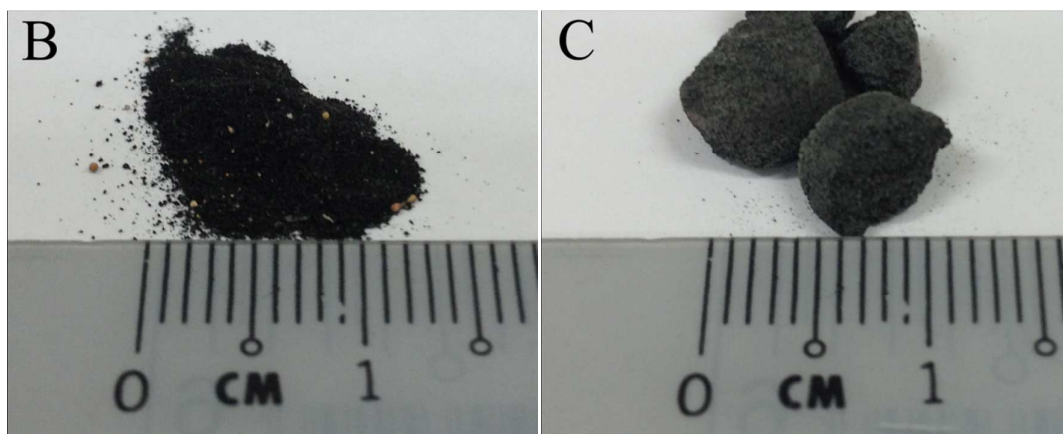

**Figure S8** Scheme of sintering (A); reacted SSS powder (B); reacted SSS with 10 %  $\text{Fe}_2\text{O}_3$  (C)
